# Supplementary material for: Effects of the diphenyl ether additive in halogen-free processed non-fullerene acceptor organic solar cells
Source: Royal Society of Chemistry journal article supplement (doi:10.1039/d2ta08603d), 2023-01-01
Supplement: d2ta08603d1.pdf [file d2ta08603d1.pdf]

# Effects of the diphenyl ether additive in halogen-free processed non-fullerene acceptor organic solar cell

## Supplementary Information

Lorenzo Di Mario<sup>1</sup>, David Garcia Romero<sup>1</sup>, Meike J. Pieters<sup>1</sup>, Fabian Eller<sup>2</sup>, Eva M. Herzig<sup>2</sup>,  
Chenhui Zhu<sup>3</sup>, Giovanni Bongiovanni<sup>4</sup>, Andrea Mura<sup>4</sup>, Maria A. Loi<sup>1,\*</sup>

### *Affiliations*

1) Zernike Institute for Advanced Materials, University of Groningen, Nijenborgh 4, Groningen 9747 AG, The Netherlands

2) Dynamics and structure formation – Herzig Group, Institute of Physics, University of Bayreuth, Universitätsstraße 30, Bayreuth 95447, Germany

3) Lawrence Berkeley National Laboratory, Advanced Light Source, Berkeley, CA, 94720 USA

4) Dipartimento di Fisica, Università degli studi di Cagliari, Monserrato I-09042, Italy

\* Corresponding author email: [m.a.loi@rug.nl](mailto:m.a.loi@rug.nl)

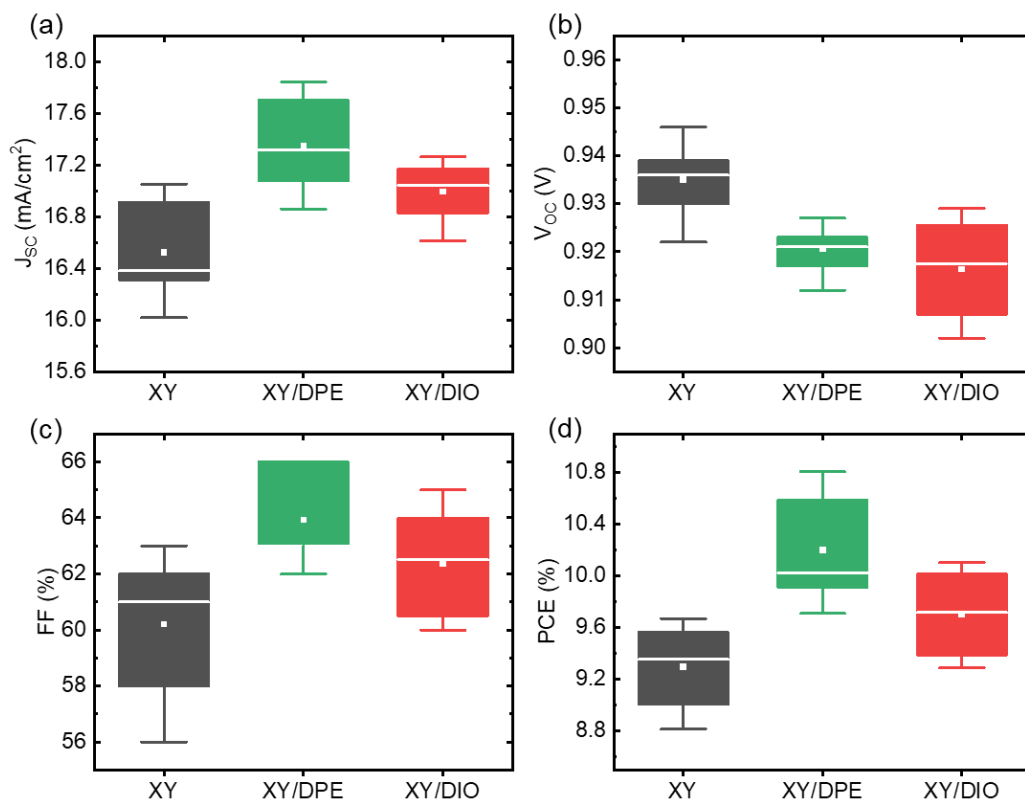

**Figure S1** Box charts of the photovoltaic parameter distributions for devices fabricated spin coating the blend solution without additive, with DPE and with DIO. Values from 15 devices for each condition. The active area of the devices is 10 mm<sup>2</sup>.

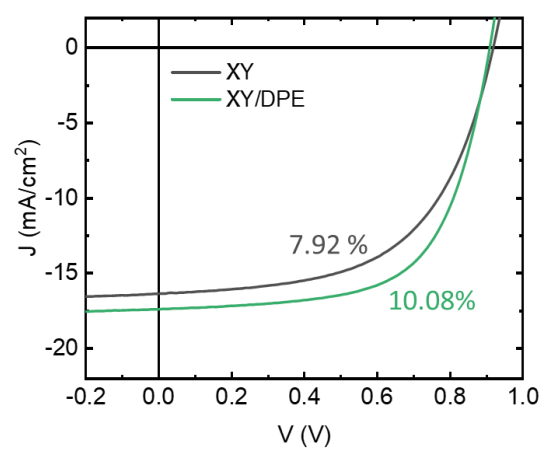

**Figure S2** J-V curves under illumination (AM 1.5, 100 mW cm<sup>-2</sup>) of TPD-3F:IT-4F devices fabricated depositing the active layer by blade coating, from a solution without additive and with 3 wt% of DPE. Numbers indicate the PCE obtained for each device.

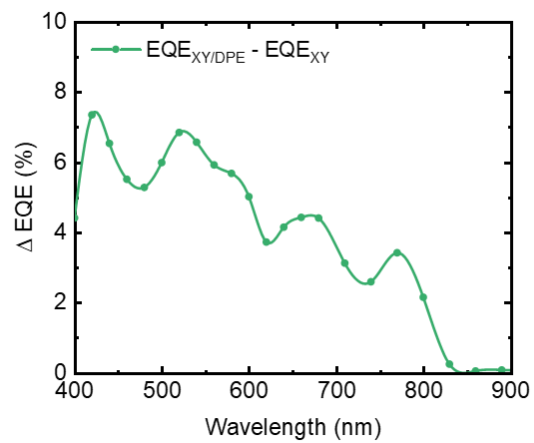

**Figure S3** Difference of external quantum efficiency ( $\Delta EQE$ ) between TPD-3F:IT-4F devices fabricated with DPE and devices fabricated without additive.

**Table S1** Components of the equivalent circuit as extracted by fitting the Nyquist plot data for TPD-3F:IT-4F devices fabricated with and without the use of DPE.

| <b>Solution</b> | <b><math>R_s</math> (ohm)</b> | <b>L (<math>\mu</math>H)</b> | <b><math>R_p</math> (kohm)</b> | <b>CPE (nF)</b> | <b>CPE-P</b> | <b><math>\tau</math> (<math>\mu</math>s)</b> |
|-----------------|-------------------------------|------------------------------|--------------------------------|-----------------|--------------|----------------------------------------------|
| XY              | 54.02                         | 2.493                        | 3.831                          | 12.66           | 0.918        | 48.50                                        |
| XY/DPE          | 22.20                         | 2.524                        | 1.786                          | 29.49           | 0.887        | 52.67                                        |

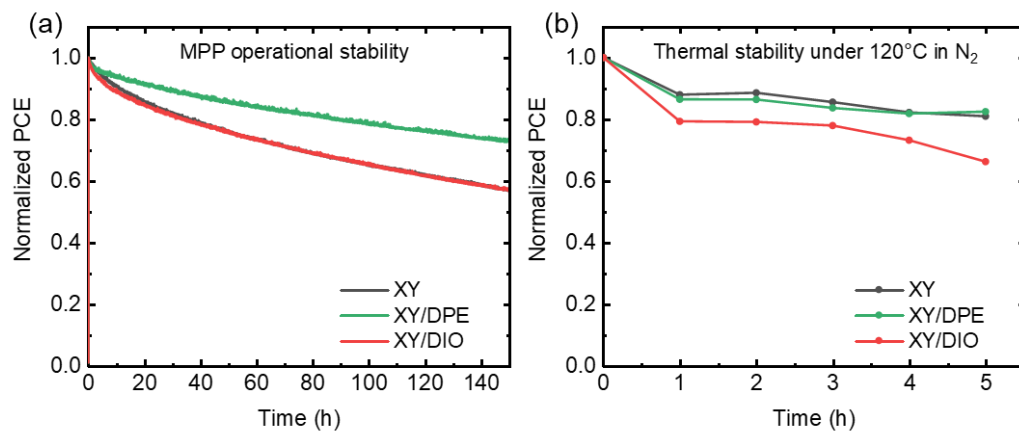

**Figure S4** Stability of TPD-3F:IT-4F solar cells fabricated casting the blend film from a solution without additive, with DPE and with DIO: (a) stability in operation at maximum power point (MPP), under continuous illumination (AM 1.5, 100 mW cm<sup>-2</sup>); (b) thermal stability, annealing solar cells at 120 °C in N<sub>2</sub> atmosphere.

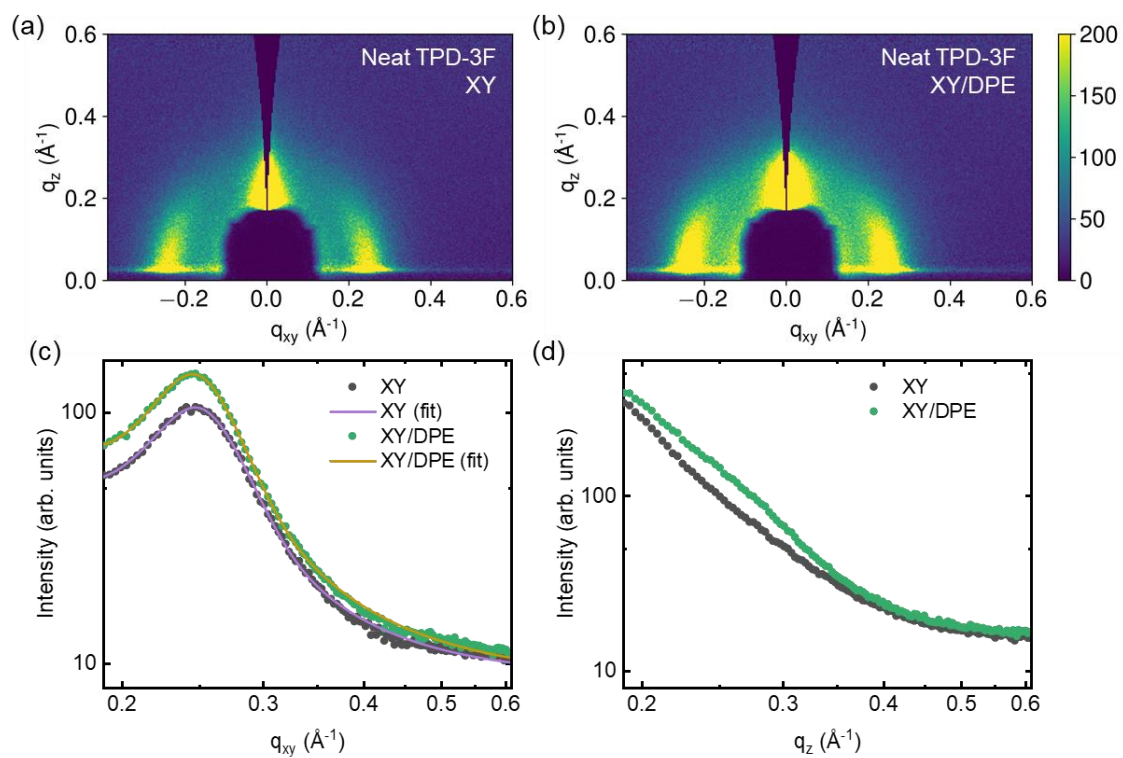

**Figure S5** 2D GIWAXS data and cuts of measurements on films of pure TPD-3F donor cast with and without the use of DPE in solution: 2D false-color maps for a film without additive (a) and with additive (b); corresponding in-plane (c) and out-of-plane (d) line cuts.

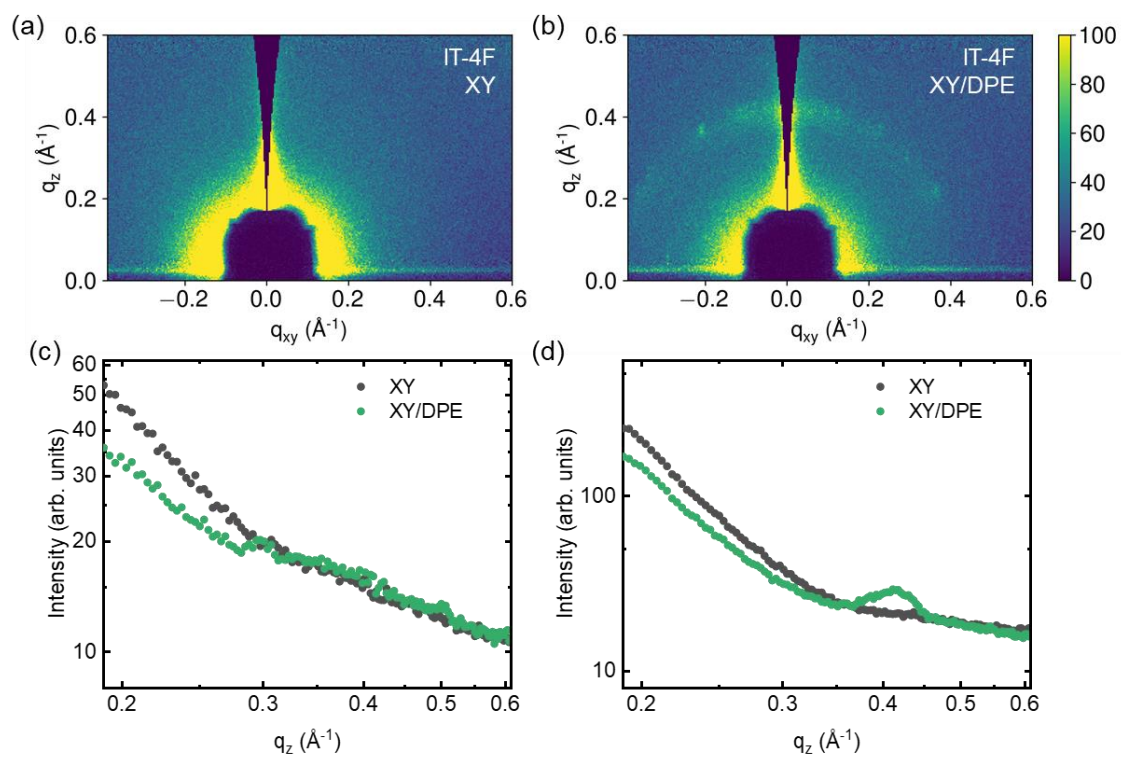

**Figure S6** 2D GIWAXS data and cuts of measurements on films of neat IT-4F acceptor cast with and without the use of DPE in solution: 2D false-color maps for a film without additive (a) and with additive (b); corresponding in-plane (c) and out-of-plane (d) line cuts.



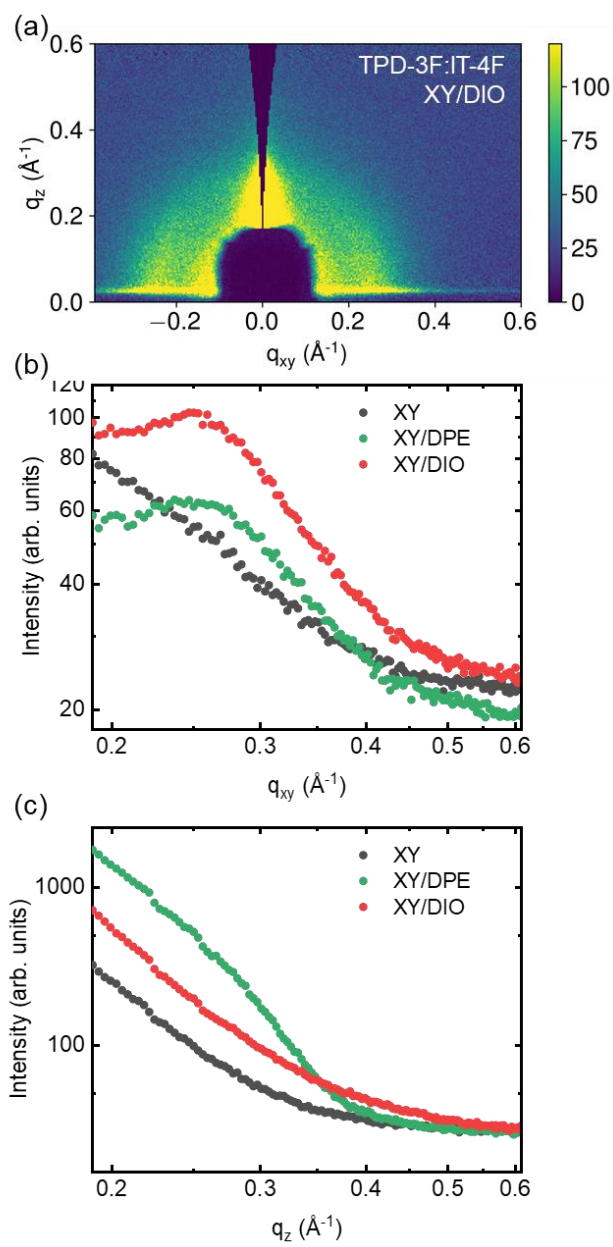

**Figure S7** 2D GIWAXS data and cuts of measurements on TPD-3F:IT-4F blend films cast with the use of DIO in solution: 2D false-color maps (a) and corresponding in-plane (b) and out-of-plane (c) line cuts.

**Table S2** Fitting parameters for the time-resolved PL decays and calculated average lifetimes.

| <b>Solution</b> | <b>A<sub>1</sub></b> | <b>τ<sub>1</sub> (ps)</b> | <b>A<sub>2</sub></b> | <b>τ<sub>2</sub> (ps)</b> | <b>A<sub>3</sub></b> | <b>τ<sub>3</sub> (ps)</b> | <b>τ<sub>avg</sub> (ps)</b> |
|-----------------|----------------------|---------------------------|----------------------|---------------------------|----------------------|---------------------------|-----------------------------|
| XY              | 0.59                 | 4.5                       | 0.25                 | 15.5                      | 0.03                 | 68.3                      | 24.6                        |
| XY/DPE          | 0.71                 | 5.2                       | 0.20                 | 16.7                      | 0.01                 | 64.2                      | 16.4                        |

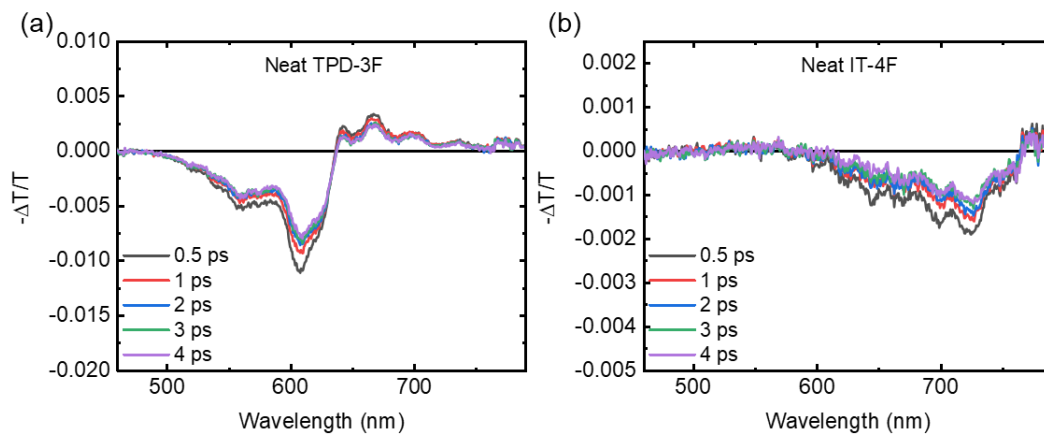

**Figure S8** Transient transmission spectra acquired at different time delays for the films of pure TPD-3F donor (a) and of pure IT-4F acceptor. Excitation wavelength 360 nm. Films cast without using any additive.

**Table S3** Photovoltaic parameters of solar cells fabricated casting the blend film from a solution without additive and with DPE in different concentrations.

| <b>Solution</b> | <b>V<sub>oc</sub> (V)</b> | <b>J<sub>sc</sub> (mA cm<sup>-2</sup>)</b> | <b>FF (%)</b> | <b>PCE (%)</b> |
|-----------------|---------------------------|--------------------------------------------|---------------|----------------|
| XY              | 0.921                     | 16.49                                      | 51.59         | 7.83           |
| XY/1% DPE       | 0.931                     | 15.19                                      | 60.10         | 8.50           |
| XY/3% DPE       | 0.915                     | 16.88                                      | 62.27         | 9.62           |
| XY/5% DPE       | 0.911                     | 17.14                                      | 60.23         | 9.41           |

From the results of the characterizations reported in the manuscript for the concentration of 3% in comparison with the sample without additive, it is reasonable to expect differences in the nanostructure with a different concentration of DPE. This indeed, it is expected to affect the solar cell performance. The concentration of 1% is not enough to achieve a sufficient phase separation of the two blend components, with the result of a not optimal charge carrier collection (as supported by the low short circuit current of the solar cells). On the other hand, a concentration of 5% leads to an excessive segregation of the two components, with big domain size and, thus, with increased non-radiative recombination (as supported by the low open circuit voltage and fill factor of the solar cells).
